# Supplementary material for: Use of a head-to-tail peptide cyclase to prepare hybrid RiPPs
Source: Chem Commun (Camb). 2024 Jun 4;60(51):6508–11. doi: 10.1039/d3cc04919a (PMC11189026; doi:10.1039/d3cc04919a)
Supplement: CC-060-D3CC04919A-s001 [file CC-060-D3CC04919A-s001.pdf]

**Electronic Supplementary Information**  
**Use of a head-to-tail peptide cyclase to prepare hybrid RiPPs**

Tung Le,<sup>a</sup> Dongtianyu Zhang,<sup>a</sup> Rachel Martini,<sup>b</sup> Subhanip Biswas,<sup>a</sup>  
and Wilfred A. van der Donk<sup>a,b,\*</sup>

<sup>a</sup>Department of Chemistry and Howard Hughes Medical Institute, University of Illinois at Urbana–Champaign, 600 S. Mathews Ave, Urbana, IL 61801, USA

<sup>b</sup>Department of Biochemistry, University of Illinois at Urbana–Champaign, 600 S. Mathews Ave, Urbana, IL 61801, USA

\*Correspondence: [vddonk@illinois.edu](mailto:vddonk@illinois.edu) (W.A. van der Donk); phone: (217) 244-5360, fax: (217) 244-8533.

## Table of contents

|                                                                                                                |    |
|----------------------------------------------------------------------------------------------------------------|----|
| Materials and methods .....                                                                                    | 4  |
| Liquid chromatography – Mass spectrometry .....                                                                | 4  |
| Materials for cloning .....                                                                                    | 4  |
| Plasmid constructs .....                                                                                       | 5  |
| Molecular cloning .....                                                                                        | 5  |
| Strains and culturing .....                                                                                    | 6  |
| General peptide expression and purification .....                                                              | 6  |
| Expression and purification of OaAEP1 (C247A) .....                                                            | 7  |
| Purification of native subtilisin A .....                                                                      | 8  |
| Design strategy for generating subtilisin A using OaAEP1 .....                                                 | 8  |
| Expression and purification of SboA(NGL) and its variants .....                                                | 9  |
| Protease digest of SboA(NGL) and its variants .....                                                            | 9  |
| OaAEP1 cyclization of SboA_NGL and its variants .....                                                          | 9  |
| 2-PCA reaction with native subtilisin A and OaAEP-1-cyclized SboA(NGL)(-N1) .....                              | 9  |
| HPLC purification of SboA(NGL) and its variants .....                                                          | 10 |
| LC-MS/MS analysis of SboA variants .....                                                                       | 10 |
| Expression and purification of ProcA2.8(15RGD)_NGL and ProcA2.8(16RGD)_NGL .....                               | 11 |
| LahT digest and HPLC purification of ProcA2.8(15RGD)_NGL and ProcA2.8(16RGD)_NGL .....                         | 11 |
| OaAEP1 cyclization of ProcA2.8(15RGD)_NGL and ProcA2.8(16RGD)_NGL .....                                        | 11 |
| HPLC purification of ProcA2.8(15RGD)_NGL and ProcA2.8(16RGD)_NGL .....                                         | 11 |
| Fluorescence polarization competition of ProcA2.8(15RGD)_NGL and ProcA2.8(16RGD)_NGL binding to integrin ..... | 12 |
| Expression and purification of LctA_NGL .....                                                                  | 12 |
| Protease digest of LctA(NGL) .....                                                                             | 13 |
| OaAEP1 cyclization of LctA_NGL core .....                                                                      | 13 |
| HPLC purification of LctA(NGL) and its variants .....                                                          | 13 |
| OaAEP1 cyclization of LctA_NGL core and trypsin digestion .....                                                | 13 |
| Minimum Inhibitory Concentration measurement of lacticin 481 and cyclic variant .....                          | 13 |
| Expression and purification of SunA <sub>core</sub> _NGL .....                                                 | 14 |
| Alkylation of SunA <sub>core</sub> _NGL .....                                                                  | 15 |

|                                                              |    |
|--------------------------------------------------------------|----|
| OaAEP1 cyclization of SunA <sub>core</sub> _NGL .....        | 15 |
| LC-MS/MS analysis of sublancin variants.....                 | 15 |
| Determination of the MIC for sublancin and its variants..... | 15 |
| Supplementary Figures and Tables .....                       | 16 |
| Protein sequences.....                                       | 29 |
| References .....                                             | 31 |

## Materials and methods

### Liquid chromatography – Mass spectrometry

Prep-scale RP-HPLC was performed on a Shimadzu HPLC Nexera system using (H<sub>2</sub>O + 0.1%TFA) and (MeCN + 0.1%TFA) as solvent system.

MALDI-TOF MS was carried out on a Bruker Daltonics UltrafleXtreme MALDI TOF/TOF instrument or Bruker Autoflex MALDI TOF. Super DHB (Sigma) was used as MALDI matrix.

LC-ESI-Q/TOF MS (ESI, electrospray ionization; Q: quadrupole) and MS/MS analyses were conducted using an Agilent Infinity1260 LC coupled to an Agilent 6545 LC/QTOF instrument, using (H<sub>2</sub>O + 0.1%FA) and (MeCN + 0.1%FA) as solvent system. The general qTOF conditions were:

|                         |          |
|-------------------------|----------|
| Polarity                | Positive |
| Data storage            | Centroid |
| Acquisition range (m/z) | 100-1700 |
| Gas temp (°C)           | 320      |
| Gas Flow (l/min)        | 13       |
| Nebulizer (psig)        | 35       |
| Sheath gas temp         | 275      |
| Sheath gas flow         | 12       |
| Vcap                    | 3500     |
| Nozzle Voltage          | 1000     |
| Fragmentor (V)          | 125      |
| Skimmer                 | 65       |
| Octopole RFPeak         | 750      |
| Scan rate (spectra/s)   | 10       |

MS/MS spectra were matched using Interactive peptide spectral annotator.<sup>1</sup>

### Materials for cloning

Oligonucleotides were obtained from Integrated DNA Technologies. Cloning was performed using restriction enzymes, Q5 polymerase (for PCR), NEBridge® Golden Gate Assembly BsaI-HF (for Golden Gate assembly), and NEB Hifi DNA Assembly (for Gibson isothermal assembly) purchased from New England Biolabs (NEB). All polymerase chain reactions were carried out on a C1000 thermal cycler (Bio-Rad). DNA sequencing was performed by ACGT, Inc. Antibiotics for culturing cells were purchased from GoldBio. Media components were purchased from Bacto™ (Thermo Fisher).

## Plasmid constructs

| Plasmid                                              | Source            |
|------------------------------------------------------|-------------------|
| pRSF : His-ProcA2.8(15RGD) : ProcM                   | Ref. <sup>2</sup> |
| pRSF : His-ProcA2.8(16RGD) : ProcM                   | Ref. <sup>2</sup> |
| pRSF : His-ProcA2.8(15RGD)_NGL : ProcM               | This study        |
| pRSF : His-ProcA2.8(16RGD)_NGL : ProcM               | This study        |
| pRSF : His-lctA : lctM                               | Ref. <sup>3</sup> |
| pRSF : His-lctA_NGL : lctM                           | This study        |
| pRSF : His6_SUMO_tev_SunA <sub>core</sub> _NGL: SunS | This study        |
| pETDuet : His-SboA : AlbA                            | This study        |
| pETDuet : His-SboA_NGL : AlbA                        | This study        |
| pETDuet : His-SboA(insR2)_NGL : AlbA                 | This study        |

## Molecular cloning

### Cloning of pRSF : His-ProcA2.8(15RGD)\_NGL : ProcM and pRSF : His-ProcA2.8(16RGD)\_NGL : ProcM

Plasmids pRSF : His-ProcA2.8(15RGD) : ProcM and pRSF : His-ProcA2.8(16RGD) : ProcM were used as templates for PCR using primers:

|                  |                                         |
|------------------|-----------------------------------------|
| p28(15RGD)_NGL_R | gcggccgcttaAAGACCATTgcactcatcgccacgatag |
| p28(15RGD)_NGL_F | gcgatgagtgaatGGTCTTtaagcggccgcataatgc   |
| p28(16RGD)_NGL_R | gccgcttaCAGACCATTgcaatcaccacgccaatag    |
| p28(16RGD)_NGL_F | gtgattgcAATGGTCTGtaagcggccgcataatgc     |

The two PCR products were gel-purified and re-assembled using Gibson assembly

### Cloning of pRSF : His-lctA\_NGL : lctM

Plasmid pRSF : His-lctA : lctM was used as template for PCR using primers:

|            |                                                 |
|------------|-------------------------------------------------|
| lctA_NGL_R | gcggccgcttaAAGACCATTtagagcagcaagtaaatacaaattgcc |
| lctA_NGL_F | cttgctgctctAATGGTCTTtaagcggccgcataatgctt        |

The PCR product was gel-purified and assembled using Gibson assembly.

### Cloning of pETDuet : His-SboA : AlbA and variant constructs

All pETDuet backbones used in this study had the BsaI cut site removed for Golden Gate cloning.

To achieve this, plasmid pET-Duet was amplified with primers:

|                 |                                    |
|-----------------|------------------------------------|
| pETDuet-xBsaI_R | AACGACGGTCTCGtcGcgcggtatcattgcagca |
| pETDuet-xBsaI_F | AACGACGGTCTCGgCgaccacgctcaccggct   |

The PCR product was gel-amplified and re-assembled with Golden Gate cloning to yield pETDuet(xBsaI) plasmid free of BsaI cut site.

### pETDuet : His-SboA : AlbA

For preparing the backbone, pETDuet(xBsaI) was amplified with primers:

|                       |                                                    |
|-----------------------|----------------------------------------------------|
| pETDuet-xBsaI FWD (1) | AGCAAGGGTCTCGgtaattaacctaggctgctgcc                |
| pETDuet-xBsaI REV (1) | AGCAAGGGTCTCGttcatcgaaatcgatcctggct                |
| pETDuet-xBsaI FWD (2) | AGCAAGGGTCTCGgataataatgcttaagtgaacagaaagt          |
| pETDuet-xBsaI REV (2) | AGCAAGGGTCTCGacatatgtatatctccttcttatacttaactaatact |

The two PCR products were gel-purified.

For inserts, *B. subtilis* 168 was cultured in 5 mL of LB media, followed by gDNA extraction with PureLink™ Genomic DNA Mini Kit (ThermoFisher). The gDNA was used as template for PCR reactions with primers:

|                  |                                            |
|------------------|--------------------------------------------|
| SboA BGC FWD (1) | AGCAAGGGTCTCGtaaaaaagctgtcattgtgga         |
| SboA BGC REV (1) | AGCAAGGGTCTCGtatcccatagaccgaatagac         |
| SboA BGC FWD (2) | AGCAAGGGTCTCGatgtttccatttattaatgaaagtgaaga |
| SboA BGC REV (2) | AGCAAGGGTCTCGttactaaataagctggaccacgctc     |

to amplify *sboA* and *alba* genes. The two PCR products were gel-purified

All four fragments from above were assembled with Golden Gate assembly to yield pETDuet : His-SboA : Alba

#### **Cloning variants of pETDuet : His-SboA : Alba**

pETDuet : His-SboA : Alba was amplified with the following primer pairs:

|             |                                               |
|-------------|-----------------------------------------------|
| SboA(NGL) F | ATTGGCGGTCTCCGCCTTTAAtaatgcttaagtcgaacagaaagt |
| SboA(NGL) R | ATTGGCGGTCTCCAGGCCATTtcccatagaccgaatagac      |

The PCR product was gel-purified and re-assembled using Golden Gate assembly to yield pETDuet : His-SboA NGL : Alba. This plasmid was then amplified with primers:

|               |                                            |
|---------------|--------------------------------------------|
| SboA(insR2) R | CTACGTGGTCTCCcggttttctacaatgacagctttttcatc |
| SboA(insR2) F | CTACGTGGTCTCCaccgtaaaggtgtgcaacatgct       |

The two PCR products were gel-purified and re-assembled with Golden Gate assembly to yield corresponding variant constructs.

#### **Strains and culturing**

Unless stated otherwise, *E. coli* NEB Turbo and *E. coli* BL21(DE3)-T1<sup>R</sup> were used as hosts for cloning and protein expression, respectively. Cells were cultured using LB or TB media supplemented with appropriate antibiotics at the following concentration: ampicillin/carbenicillin (100 µg/mL), kanamycin (50 µg/mL), chloramphenicol (25 µg/mL).

#### **General peptide expression and purification**

|                |                                                                                                           |
|----------------|-----------------------------------------------------------------------------------------------------------|
| Start buffer   | 100 mM NaH <sub>2</sub> PO <sub>4</sub> , 10 mM Tris, 6 M guanidine, 10 mM imidazole, 500 mM NaCl, pH 8.0 |
| Wash buffer    | 100 mM NaH <sub>2</sub> PO <sub>4</sub> , 10 mM Tris, 6 M guanidine, 50 mM imidazole, 500 mM NaCl pH 8.0  |
| Elution buffer | 20 mM HEPES, 500 mM imidazole, 300 mM NaCl, pH 8.0                                                        |

Plasmid containing His-tagged peptide was used to transform *E. coli* BL21 T1<sup>R</sup>. Several colonies from overnight plates were used to inoculate 5-10 mL cultures of media (+antibiotics), cultured at 37 °C for 5-6 h until visible growth, then sub-cultured to 500 mL of media (+antibiotics) and cultured at 37 °C, at 220 rpm. When the OD<sub>600</sub> reached ~1-2, expression in the culture was induced with 0.25 mM IPTG, and the cells were cultured at 18 °C, 220 rpm for further 16-20 h. Cells were harvested by centrifugation at 5,000xG, 15 min, resuspended in Start buffer at 5 mL per gram cell pellets and stored at -70 °C until use.

Purification was performed at room temp. Cells were lysed by sonication on ice (Vibra Cells, 50% amplitude, 10 s ON – 10 s OFF, total 4 min ON time. Lysate was clarified by centrifugation at 12,000xG for 30 min, then carefully decanted into Ni resin (His6 Takara Superflow resin, 2 mL resin / L culture) pre-equilibrated in Start buffer. The resuspension was slowly rotated for 30-45 min. Resin was collected by centrifugation at 1,000xg for 5 min, then applied to empty gravity column. Resin was washed with 20-30 column volumes (CV) of Wash buffer until  $A_{280} < 0.05$ . Peptide was eluted by ~4 CV of Elution Buffer.

### Expression and purification of OaAEP1 (C247A)

His-tagged Ulp-1 protease (also called SUMO protease) was a gift from the Nair lab at UIUC. pBHRSF184 was a gift from Hideo Iwai (Addgene plasmid # 89482 ; <http://n2t.net/addgene:89482> ; RRID:Addgene\_89482).<sup>4</sup> This plasmid was used as template for QuikChange mutagenesis to mutate Cys247 residue of OaAEP1 to Ala, which was shown to improve the kinetic efficiency of this enzyme.<sup>5</sup> The resulting plasmid was called pBHRSF184 : His6\_SUMO\_OAAEP (C247A). This plasmid was used to transform Shuffle T7 *E. coli* (NEB). Single colony was cultured overnight, followed by subculturing into 2 L of LB(+kan) (37 °C, 200 rpm). When OD<sub>600</sub> reached 0.6-0.8, the culture was cooled in an ice-water bath for 5-10 min and induced with 0.25 mM IPTG, then returned to the shaker (18 °C, 200 rpm) for 18-20 h, resulting in ~4-5 g cell pellet/L culture.

|          |                                                                  |
|----------|------------------------------------------------------------------|
| Buffer A | 20 mM HEPES, 500 mM NaCl, 10% glycerol, pH 8.0                   |
| Buffer B | 20 mM HEPES, 300 mM NaCl, 300 mM imidazole, 10% glycerol, pH 8.0 |
| Ulp-1    | 20 mM HEPES, 150 mM NaCl, 0.5 mM DTT, 10% glycerol, pH 8.0       |

Cell pellet was harvested at 5000xg, 10 min and resuspended (5 mL/g pellet) in Buffer A + 10 mM imidazole. To ensure lysis, cells were passed three times through an Avestin Homogenizer C3 (10,000-15,000 psi) and clarified by centrifugation at 12,000xg for 30 min. The supernatant was decanted into Ni resin (2 mL resin / L culture), and slowly rotated in a cold room for 30-45 min. The resin was collected by centrifugation at 1,000xg for 5 min, then loaded to an empty gravity column (Bio-Rad). The column was washed with 4-5 CV of ATP wash buffer (Buffer A + 5 mM MgCl<sub>2</sub>, 5 mM ATP, 50 mM imidazole), followed by Wash buffer (Buffer A + 50 mM imidazole) until  $A_{280}$  was  $< 0.05$ . The ATP wash would release any bound chaperone protein (DnaK).<sup>6</sup> Protein was eluted with 4 CV of Buffer B, concentrated using an Amicon 50K MWCO and the buffer was exchanged to Ulp-1 buffer using a PD-10 Column (Cytiva). The yield of protein was 5-6 mg/L culture. To the protein solution (~50  $\mu$ M), His-tagged Ulp-1 protease was added to 0.2  $\mu$ M final concentration and incubated at RT for 2 h to cleave off SUMO tag. After cleavage was completed, the reaction was concentrated using an Amicon 30K MWCO and the protein was further purified with Size-Exclusion Chromatography:

|            |                                  |
|------------|----------------------------------|
| Column     | Superdex 75 Increase 10/300GL    |
| SEC buffer | 20 mM HEPES, 150 mM NaCl, pH 8.0 |
| Flow rate  | 0.4 mL/min                       |

Zymo-OaAEP1 eluted after 10 mL.

To activate autolysis activity of OaAEP1, TCEP (0.5 mM final) and EDTA (1 mM final) was added to Zymo-OaAEP1 protein solution. Next, aliquots of 1 M aqueous NaOAc pH 3.6 was added to acidify the solution such that pH  $< 4.5$  (this usually requires 1:10 to 1:20 volume), followed by

incubation at RT overnight. After this period, there would be white flocculent which contained some precipitated proteins. The pH was brought to ~ 6-7 by addition of aliquots of 1 M HEPES pH 7.0 followed by centrifugation to remove the precipitate.

Finally, the supernatant, which contained core OaAEP1 and the cap domain, was concentrated using Amicon 10K MWCO and stored at -70 °C.

### Purification of native subtilisin A

Purification of native subtilisin A was performed following a published procedure with slight modification.<sup>7</sup> For 1-L culture scale, 25 g of Amberlite XAD16 resin (Fisher) was soaked in 10 vol of water for 30 min, followed by 10 vol of MeOH for 30 min to swell the resin. Then the resin was soaked in 10 vol of water and the water drained before use.

*B. subtilis* 168 was cultured overnight in LB media at 37 °C, then sub-cultured (1:100) into 1 L of LB media at 37 °C and 220 rpm until an OD<sub>600</sub> of 0.8 was reached. Afterwards the shaking was reduced to 100 rpm and the cells were cultured for additional 24 h. Following centrifugation at 5000xg for 10 min, the culture supernatant was collected and acidified by addition of TFA to 0.5% final concentration. The supernatant was clarified again at 5000xg for 10 min, then decanted into 25 g of XAD16 resin prepared as described above. The suspension was shaken at 100 rpm and room temperature overnight. The next day, the resin was collected by applying vacuum through a 600-mL glass frit, then washed twice with 200 mL of DI water. The compound was eluted by addition of 100 mL of MeOH with intermittent swirling for 15-20 min. The elution step was repeated once. The eluent fractions were combined and evaporated with a rotavap until a brown residue remained. The residue was dissolved with 100 mL of n-butanol:water (1:1 vol). The upper organic phase was collected, evaporated with a rotovap to almost dryness (cloudy yellow suspension). The suspension was dissolved with 30-40 mL of methanol:water (1:1 vol), filtered and further purified with a RP-HPLC system.

|          |                                                                            |
|----------|----------------------------------------------------------------------------|
| Solvent  | A: Water + 0.1% TFA<br>B: MeCN + 0.1% TFA                                  |
| Column   | MacNagel® 5 µm C18 100 Å, LC Column 250 x 10 mm                            |
| Gradient | 4 mL/min<br>0-5 min: 10-40% B<br>5-25 min: 40-60% B<br>25-30 min: 60-80% B |

The collected fractions were checked with MALDI-TOF MS. Under this condition, subtilisin A elutes around 27 min. The final yield was ~ 0.6 mg per L culture.

### Design strategy for generating subtilisin A using OaAEP1

N-to-C cyclized natural product peptides have a specific site of enzymatic cyclization, but after cyclization that site becomes traceless. Hence, as has been pointed out previously,<sup>8</sup> alternative sites of cyclization are possible by designing the cyclization substrate such that upon cyclization an identical structure is formed (circular permutation of the cyclization site). In our case, subtilisin is

naturally cyclized by amide bond formation between the amino group of Asn1 and the carboxylate of Gly35 (Fig. 2, main text). Since the OaAEP enzyme recognizes the NGL sequence and cleaves after Asn, we reasoned that the subtilisin ring could also be made by cyclization of the amino group of Lys2 and the carboxylate of an Asn placed at position 36 with the removal of Asn1 (Fig. 2).

### **Expression and purification of SboA(NGL) and its variants**

Expression was done using LB media (+amp/cam) supplemented with Trace Metal mix (Teknova T1001). *E. coli* BL21-DE3(T1<sup>R</sup>) was co-transformed with pETDuet : His-SboA\_NGL : AlbA and pACYC-sufABCDSE, which contained genes for assembly of Fe-S clusters. Overnight culture from single colony was sub-cultured (1:200) into LB media, and cultured at 37 °C, 220 rpm for 2-3 h until OD<sub>600</sub> ~ 0.5-0.7. The culture was incubated on ice for 5-10 min, induced with 0.25 mM IPTG and cultured at 18 °C, 80 rpm overnight (18-20 h). Cell pellet was harvested and purified according to the protocol in *General peptide expression and purification*. Eluted peptide was desalted with a C8 SPE column (ThermoFisher HyperSep, 500 mg resin bed) and lyophilized to dryness. Final yield of full-length peptide was ~3 mg/L culture.

### **Protease digest of SboA(NGL) and its variants**

- Lys-N digestion: Full-length SboA peptide was dissolved in water to 100 µM. HEPES 1 M pH 7.0 was added to 100 mM final concentration, followed by Lys-N to 1 µM final concentration. The reaction was incubated at 37 °C for 3 h.
- Arg-C digestion: Full-length peptide was dissolved in water to 100 µM and sonicated for 5 min to facilitate solubilization. Then 10X buffer (500 mM Tris pH 7.6, 10 mM CaCl<sub>2</sub>) was added to 1X, followed by 1 M DTT to 10 mM final concentration. Arg-C was added to 1-2 µM. The reaction was incubated at 37 °C for 2 h.
- Lys-C digestion of native subtilisin A and cyclized products from OaAEP-1 cyclization of SboA(NGL)(-N1): Native subtilisin A and the two cyclized products obtained from OaAEP-1 cyclization of SboA(NGL)(-N1) (shown in Fig. S1a) were dissolved in 50 mM HEPES, pH 7.0 to 100 µM final concentration. Lys-C was then added to 2 µM final concentration and the reaction was incubated at 37 °C for 2 h. Presence of hydrolyzed product for each peptide was checked with MALDI-TOF MS.

### **OaAEP1 cyclization of SboA\_NGL and its variants**

Core peptide was dissolved in 20 mM sodium phosphate, pH 6.0 to 50-100 µM final concentration. OaAEP1 was added to 1 µM and the reaction was incubated at 37 °C for 1 h.

### **2-PCA reaction with native subtilisin A and OaAEP-1-cyclized SboA(NGL)(-N1)**

2-Pyridinecarboxaldehyde (2-PCA) is known to react exclusively with an exposed N-terminus of a peptide, and not with a lysine side chain, in part because the initial imine adduct can cyclize with the amide of the residue at position 2 of the peptide chain.<sup>9</sup> Native subtilisin A and the cyclized isomers obtained from OaAEP-1 cyclization of SboA(NGL)(-N1) on HPLC (shown in Fig. S1a) were dissolved in 20 mM sodium phosphate (pH 7.5) to 20 µM final concentration, followed by 2-pyridinecarboxaldehyde (2-PCA) to 2 mM and the reaction was incubated at 37 °C for 90 min. The reaction was acidified by the addition of 10% formic acid to 1% final concentration, and analyzed by MALDI-TOF MS. The reaction was stopped prior to completion because

transamination products of the starting material, containing an N-terminal aldehyde (M-1 Da), were observed. Such products were not observed for a standard synthetic peptide and have not been reported in other studies using 2-PCA. Apparently, the cyclization step with the amide of the second residue that makes 2-PCA selective for the N-terminal amine is slow in the context of subtilisin compared to linear peptides, which is likely caused by the constrained structure of the mature product (Figure S1e). When the cyclization step is slow, isomerization of the initially formed imine between 2-PCA and the starting peptide and hydrolysis leads to N-terminal aldehyde formation.

|          |                                                                          |
|----------|--------------------------------------------------------------------------|
| Solvent  | A: 0.1% formic acid<br>B: MeCN + 0.1% formic acid                        |
| Column   | Kinetex® 2.6 µm C8 100 Å, LC Column 150 x 2.1 mm                         |
| Gradient | 0.4 mL/min, 45 °C, 10 µL injection<br>0-3 min: 5% B<br>3-18 min: 5-95% B |

The ion chromatogram from 10.8 to 13.6 min, which spans the elution time of all relevant species, was extracted and deconvoluted.

#### HPLC purification of SboA(NGL) and its variants

When enzymatic reaction was completed, reaction was diluted (1:1 volume) with MeOH, centrifuged to remove insoluble material and injected onto a RP-HPLC system using following conditions:

|          |                                                    |
|----------|----------------------------------------------------|
| Solvent  | A: Water + 0.1% TFA<br>B: MeCN + 0.1% TFA          |
| Column   | MacNagel® 5 µm C18 100 Å, LC Column 250 x 10 mm    |
| Gradient | 4 mL/min<br>0-5 min: 2-30% B<br>5-25 min: 30-80% B |

Core peptides generally eluted between 15-20 min.

#### LC-MS/MS analysis of SboA variants

The sample was acidified by addition of 10% TFA to 1% final concentration, centrifuged to remove insoluble debris and injected to a LC-MS system. General qTOF condition was used.

|         |                                                   |
|---------|---------------------------------------------------|
| Solvent | A: 0.1% formic acid<br>B: MeCN + 0.1% formic acid |
| Column  | Kinetex® 2.6 µm C8 100 Å, LC Column 150 x 2.1 mm  |

|          |                                                                             |
|----------|-----------------------------------------------------------------------------|
| Gradient | 0.4 mL/min, 45 °C, 10 µL injection<br>0-2 min: 5-50% B<br>2-7 min: 50-95% B |
|----------|-----------------------------------------------------------------------------|

For MS/MS analysis, the qTOF was run in targeted mode, fragmenting  $[M+3H]^{3+}$  precursor ions using collision voltage of 20-25 V.

#### **Expression and purification of ProcA2.8(15RGD)\_NGL and ProcA2.8(16RGD)\_NGL**

Expression was done using TB media (+kan). BL21-DE3(T1<sup>R</sup>) was transformed with corresponding co-expression plasmids, cultured, harvested and purified according to the protocol in *General peptide expression and purification*. The eluant fraction was kept and proceeded to LahT digest.

#### **LahT digest and HPLC purification of ProcA2.8(15RGD)\_NGL and ProcA2.8(16RGD)\_NGL**

The buffer of the eluant fraction from Ni purification was exchanged to LahT150 buffer (20 mM HEPES pH 8.0, 0.5 mM TCEP) using an Amicon 3K MWCO, making sure the imidazole concentration was < 50 mM. LahT150<sup>10</sup> was added to 5 µM final concentration and the reaction was incubated at RT overnight. To quench the reaction, 10% TFA stock was added to 0.5% final concentration. The reaction was filtered and injected onto a RP-HPLC system using the following condition:

|          |                                                      |
|----------|------------------------------------------------------|
| Solvent  | A: Water + 0.1% TFA<br>B: MeCN + 0.1% TFA            |
| Column   | Phenomenex Luna 5 µm C5 100 Å, LC Column 250 x 10 mm |
| Gradient | 4 mL/min<br>0-40 min: 2-80% B                        |

The core peptide generally elutes around 20-25 min.

#### **OaAEP1 cyclization of ProcA2.8(15RGD)\_NGL and ProcA2.8(16RGD)\_NGL**

The core peptide was dissolved in 20 mM aqueous sodium phosphate, pH 6.0 to 50-100 µM final concentration. OaAEP1 was added to 1 µM and the reaction was incubated at 37 °C for 1 h.

#### **HPLC purification of ProcA2.8(15RGD)\_NGL and ProcA2.8(16RGD)\_NGL**

When the enzymatic reaction was completed, the reaction was diluted (1:1 volume) with MeOH, centrifuged to remove insoluble material and injected onto a RP-HPLC system using the following conditions:

|          |                                                 |
|----------|-------------------------------------------------|
| Solvent  | A: Water + 0.1% TFA<br>B: MeCN + 0.1% TFA       |
| Column   | MacNagel® 5 µm C18 100 Å, LC Column 250 x 10 mm |
| Gradient | 4 mL/min<br>0-40 min: 2-80% B                   |

### Fluorescence polarization competition of ProcA2.8(15RGD)\_NGL and ProcA2.8(16RGD)\_NGL binding to integrin

Binding affinity of ProcA2.8 variants for  $\alpha\beta V3$  integrin was determined via a fluorescence polarization competition assay as previously reported.<sup>2</sup> In brief, peptide was titrated against fixed concentration of  $\alpha\beta V3$  integrin (R&D Systems) and fluorescein-c(RGDyK) (Anaspec). At equilibrium, fluorescence polarization was measured and the  $K_i$  was then determined from the  $IC_{50}$  value and  $K_D$  value of probe and target protein. The experimental details are as followed.

| 2X Integrin Binding Buffer (2X IBB) | Concentration | Unit |
|-------------------------------------|---------------|------|
| Tris, pH 8.0                        | 50            | mM   |
| NaCl                                | 300           | mM   |
| CaCl <sub>2</sub>                   | 4             | mM   |
| MgCl <sub>2</sub>                   | 2             | mM   |
| MnCl <sub>2</sub>                   | 2             | mM   |
| BSA                                 | 0.2           | %    |

2X RGD-integrin sample (10 nM fluorescein-c(RGDyK) – 30 nM integrin) was prepared in 2X Integrin Binding Buffer. In a black 96-well half-area plate (Corning 3686), 20  $\mu$ L of 200  $\mu$ M peptide stock in PBS was added to the first well, followed by 10 2-fold dilutions into PBS buffer at subsequent wells. 20  $\mu$ L of 2X RGD-integrin stock was added to each well. The plate was covered from light and shaken at RT. Fluorescence polarization was measured (Biotek Synergy H4 hybrid reader) every 15 min using the following filter (Excitation : Emission – 485 nm/20 nm : 518 nm/20 nm).

The obtained data was converted to anisotropy value and plotted against peptide concentration and fitted to a dose response function using Origin Pro software:

$$y = A1 + \frac{(A2 - A1)}{1 + (\frac{IC_{50}}{x})^p}$$

Where: y = anisotropy value, A1 = minimum anisotropy, A2 = maximum anisotropy, p = Hill's coefficient (fixed at -1), x = competitor concentration. The obtained  $IC_{50}$  was used to calculate inhibition constant  $K_i$  using the Cheng-Prusoff equation:

$$K_i = \frac{IC_{50}}{1 + \frac{S}{K_D}}$$

Where: S is probe concentration, and  $K_D$  is the binding constant of probe (13 nM).

### Expression and purification of LctA\_NGL

Expression was done using TB media (+kan). *E. coli* BL21-DE3(T1<sup>R</sup>) was transformed with pRSF : His-lctA\_NGL : lctM. Cells were cultured, harvested and purified according to the protocol in

*General peptide expression and purification.* Eluted peptide was desalted with a C8 SPE column (ThermoFisher HyperSep, 500 mg resin bed) and lyophilized to dryness.

#### **Protease digest of LctA(NGL)**

Trypsin digestion: Full-length lctA\_NGL peptide was dissolved in 50 mM NH<sub>4</sub>HCO<sub>3</sub> to 100 µM. Trypsin was added to 1-2 µM. The reaction was incubated at 37 °C for 4 h.

#### **OaAEP1 cyclization of LctA\_NGL core**

Core peptide was dissolved in 20 mM sodium phosphate, pH 6.0 to 50-100 µM final concentration. OaAEP1 was added to 1 µM and the reaction was incubated at 37 °C for 1 h.

#### **HPLC purification of LctA(NGL) and its variants**

When the enzymatic reaction was completed, the reaction was diluted (1:1 volume) with MeOH, centrifuged to remove insoluble material and injected onto a RP-HPLC system using the following conditions:

|          |                                                 |
|----------|-------------------------------------------------|
| Solvent  | A: Water + 0.1% TFA<br>B: MeCN + 0.1% TFA       |
| Column   | MacNagel® 5 µm C18 100 Å, LC Column 250 x 10 mm |
| Gradient | 4 mL/min<br>0-40 min: 2-80% B                   |

#### **OaAEP1 cyclization of LctA\_NGL core and trypsin digestion**

Core peptide was dissolved in 20 mM sodium phosphate, pH 6.0 to 40 µM final concentration. OaAEP1 was added to 5 µM and the reaction was incubated at 37 °C for 24 h. 10-µL aliquot was collected and mixed with 1 µL of 0.5 M ammonium bicarbonate, followed by trypsin to 1-2 µM. The reaction was continued at 37 °C for 1 h, quenched by mixing 1:1 with 1% TFA and ziptipped for MALDI analysis.

#### **Minimum Inhibitory Concentration measurement of lacticin 481 and cyclic variant**

The MIC experiment was performed with *L. lactis* subsp. cremoris as the indicator strain,<sup>11</sup> and GM17 as culture media. Stock peptide was prepared in water at 20 µM. In a clear Nuclon 96-well plate, 50 µL of peptide solution was added to the first well, followed by nine 2-fold serial dilutions into water in the subsequent wells. Overnight bacteria culture was diluted to OD<sub>600</sub> = 0.1 using 2X GM17 media. Then, 50 µL of this culture was added to each peptide sample well, resulting in OD<sub>600</sub> = 0.05 and 1X GM17 media final concentration. A well with culture and media was used as positive growth control, and another well with water and media was used as negative growth control. The plate was covered with a clear lid and incubated at 30 °C using a BioTek Hybrid plate reader (H4) for 24 h. OD<sub>600</sub> was taken every hour after briefly shaking for 30 s. The OD<sub>600</sub> values at 18-h timepoint was plotted as function of peptide concentration and fitted using the Dose-Response curve:

$$y = A1 + \frac{(A2 - A1)}{1 + \left(\frac{IC_{50}}{x}\right)}$$

Where: y = OD value, A1 = minimum OD value, A2 = maximum OD value, x = peptide concentration.

### Expression and purification of SunA<sub>core</sub>\_NGL

The glycosylated sublancin variant was obtained via co-expression with the glycosyl transferase SunS. In this construct, the SunA core peptide was fused to an N-terminal His-SUMO tag with a TEV cleavage site. As reported previously, the glycosyl transferase SunS still recognizes SunA core peptide without the leader sequence and catalyzes the glycosylation reaction.<sup>12</sup>

Plasmid pRSF : His6\_SUMO\_tev\_SunA<sub>core</sub>\_NGL: SunS was used to transform *E. coli* K12 SHuffle cells. The cells were plated on LB agar plates with 50 mg/L kanamycin, and grown overnight at 37 °C. A single colony was picked from the plate to inoculate 5 mL of LB media with 50 mg/L kanamycin and 100 mg/L spectinomycin. The small culture was grown at 37 °C overnight, and used to inoculate 1 L of terrific broth containing 50 mg/L kanamycin. The culture was grown at 30 °C with shaking at 195 RPM, till the OD600 reached 0.8. The culture was cooled on ice for 20 min, then induced with IPTG to a final concentration of 500 µM. The cells were cultured at 18 °C for 16 h, then harvested by centrifugation at 8,000 xg for 10 min, and frozen at -70 °C.

Purification was performed at room temp. Cells were resuspended in buffer B1. Cells were lysed by sonication on ice (Vibra Cells, 50% amplitude, 2 s ON – 5 s OFF, total 4 min ON time). Lysate was clarified by centrifugation at 45,000 xg for 30 min. Supernatant was filtered with a 0.45 micron filter and loaded onto a Ni resin (His6 Takara Superflow resin, 3 mL resin /L culture) column equilibrated in B1 buffer. Resin was washed with 3 CV of buffer B2 then eluted with 4 CV of elution buffer (EB).

|           |                                                                                        |
|-----------|----------------------------------------------------------------------------------------|
| Buffer B1 | 20 mM sodium phosphate, 500 mM sodium chloride, 0.5 mM imidazole, 10% glycerol, pH 7.5 |
| Buffer B2 | 20 mM sodium phosphate, 300 mM sodium chloride, 15 mM imidazole, pH 7.5                |
| EB        | 20 mM sodium phosphate, 150 mM sodium chloride, 500 mM imidazole, pH 7.5               |

The buffer of the eluted protein was exchanged to TEV buffer (50 mM Tris pH 8.0, 0.5 mM EDTA, 3 mM glutathione, 0.3 mM oxidized glutathione) using an Amicon 3K MWCO, making sure the imidazole concentration was < 50 mM. TEV protease was added to 2-3 µM and the reaction was incubated at RT for 2 h. The reaction was quenched by adding TFA to 1% final concentration, filtered, and injected onto a RP-HPLC system for further purification:

|          |                                                    |
|----------|----------------------------------------------------|
| Solvent  | A: Water + 0.1% TFA<br>B: MeCN + 0.1% TFA          |
| Column   | Phenomenex 10 µm C5 100 Å, LC column 250 x 10 mm   |
| Gradient | 4 mL/min<br>0-5 min: 2-30% B<br>5-35 min: 30-60% B |

The peptide eluted around 15 min.

### Alkylation of SunA<sub>core</sub>\_NGL

The purified peptide was resuspended in alkylation buffer (50 mM HEPES pH 8.5, 5 mM TCEP) at 100  $\mu$ M. After 30 min at RT, aliquots of a stock solution of 100 mM IAA were added to obtain 20 mM final concentration. The reaction was incubated at RT in the dark for 30 min. The reaction was quenched by adding TFA to 1% final concentration before further analysis by MALDI-TOF MS and ESI-MS.

### OaAEP1 cyclization of SunA<sub>core</sub>\_NGL

The core peptide was dissolved in 20 mM sodium phosphate, pH 6.0 to 50-100  $\mu$ M final concentration. OaAEP1 was added to 5  $\mu$ M and the reaction was incubated at RT overnight. The next day, the reaction was quenched by adding TFA to 0.5% final concentration, cleaned up by C18 SPE column (Agilent Bond Elut) and eluted into 60% MeCN. The eluant was diluted 2-fold with water and injected onto an analytical RP-HPLC system for further purification:

|          |                                                     |
|----------|-----------------------------------------------------|
| Solvent  | A: Water + 0.1% TFA<br>B: MeCN + 0.1% TFA           |
| Column   | MacNagel 5 $\mu$ m C18 100 Å, LC Column 250 x 10 mm |
| Gradient | 4 mL/min<br>0-5 min: 2-30% B<br>5-35 min: 30-80% B  |

The peptide eluted around 17 min.

### LC-MS/MS analysis of sublancin variants

The sample was acidified by addition of 10% TFA to 1% final concentration, centrifuged to remove insoluble debris and injected onto an LC-MS system. The general qTOF condition was used.

|          |                                                                                  |
|----------|----------------------------------------------------------------------------------|
| Solvent  | A: 0.1% formic acid<br>B: MeCN + 0.1% formic acid                                |
| Column   | Kinetex® 2.6 $\mu$ m C8 100 Å, LC Column 150 x 2.1 mm                            |
| Gradient | 0.4 mL/min, 45 °C, 10 $\mu$ L injection<br>0-2 min: 5-30% B<br>2-7 min: 30-80% B |

For MS/MS analysis, the qTOF MS experiment was run in targeted mode, fragmenting  $[M+4H]^{3+}$  precursor ions using a collision voltage of 30-40 V.

### Determination of the MIC for sublancin and its variants

MIC determination for sublancin and the cyclized variant was adapted from a published protocol.<sup>12</sup> In a clear Nuclon 96-well plate, 50  $\mu$ L of peptide solution was added to the first well, followed by nine 2-fold serial dilutions into water in the subsequent wells. Overnight *B. subtilis* 168  $\Delta SP\beta$  culture was diluted to OD<sub>600</sub> = 0.1 using LB media. Then, 50  $\mu$ L of this culture was added to each peptide sample well, resulting in final OD<sub>600</sub> = 0.05. A well with culture and media was used as

positive growth control, and another well with water and media was used as negative growth control. The plate was shaken with opened lid at 30 °C using a BioTek Hybrid plate reader (H4) for 6 h and the OD<sub>600</sub> was taken every hour. Then, the plate was covered with a lid and shaken at 30 °C for additional 12 h. The OD<sub>600</sub> values at 6-h timepoint was plotted as function of peptide concentration and fitted using the Dose-Response curve:

$$y = A1 + \frac{(A2 - A1)}{1 + \left(\frac{IC_{50}}{x}\right)}$$

Where: y = OD value, A1 = minimum OD value, A2 = maximum OD value, x = peptide concentration. The MIC was determined as the peptide concentration that resulted in 90 % inhibition according to the OD value. The MIC for native sublancin was  $1.9 \pm 1.0 \mu\text{M}$ , and the MIC for cyclized sublancin was  $2.4 \pm 1.0 \mu\text{M}$ .

## Supplementary Figures and Tables

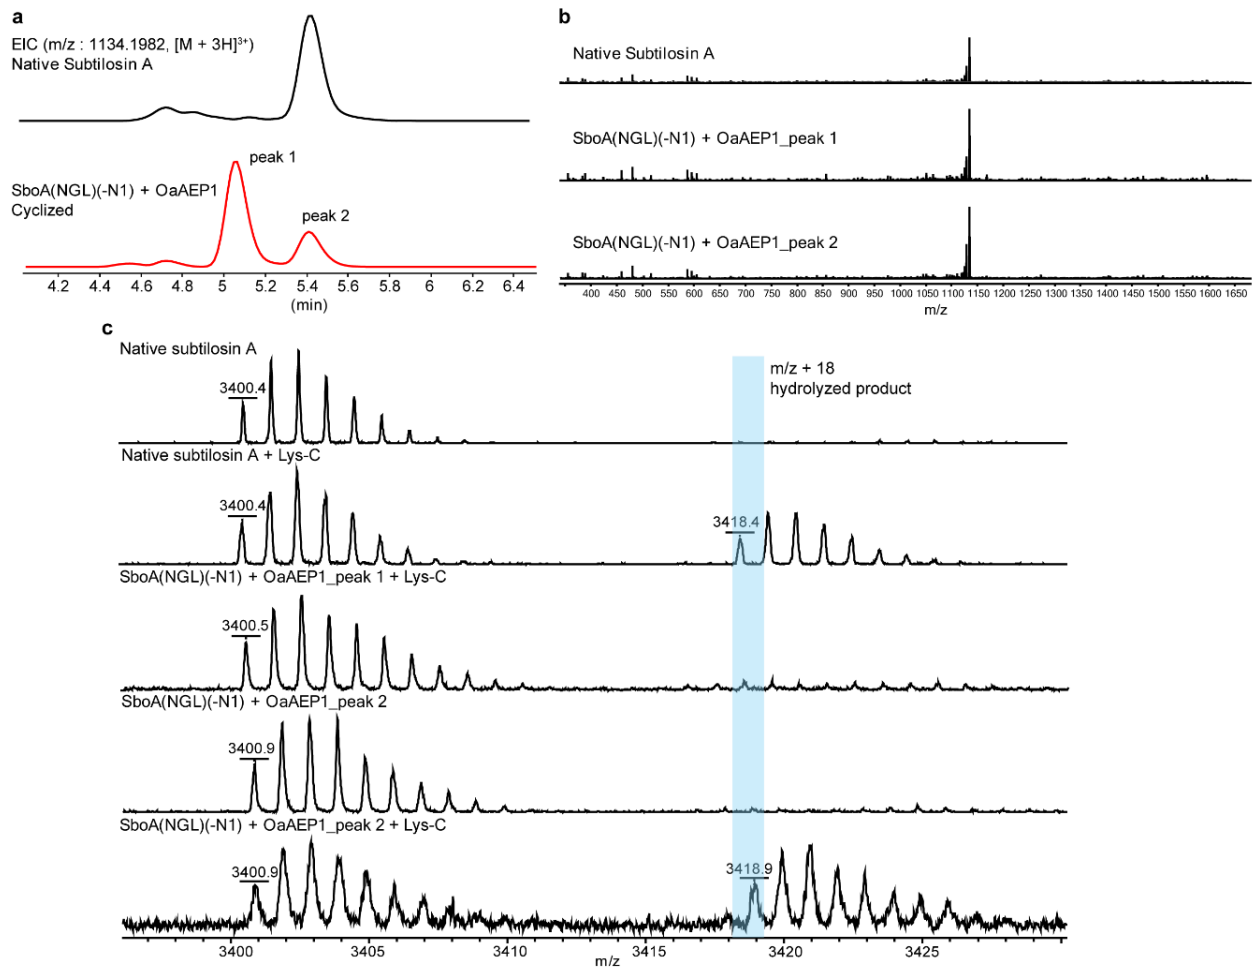

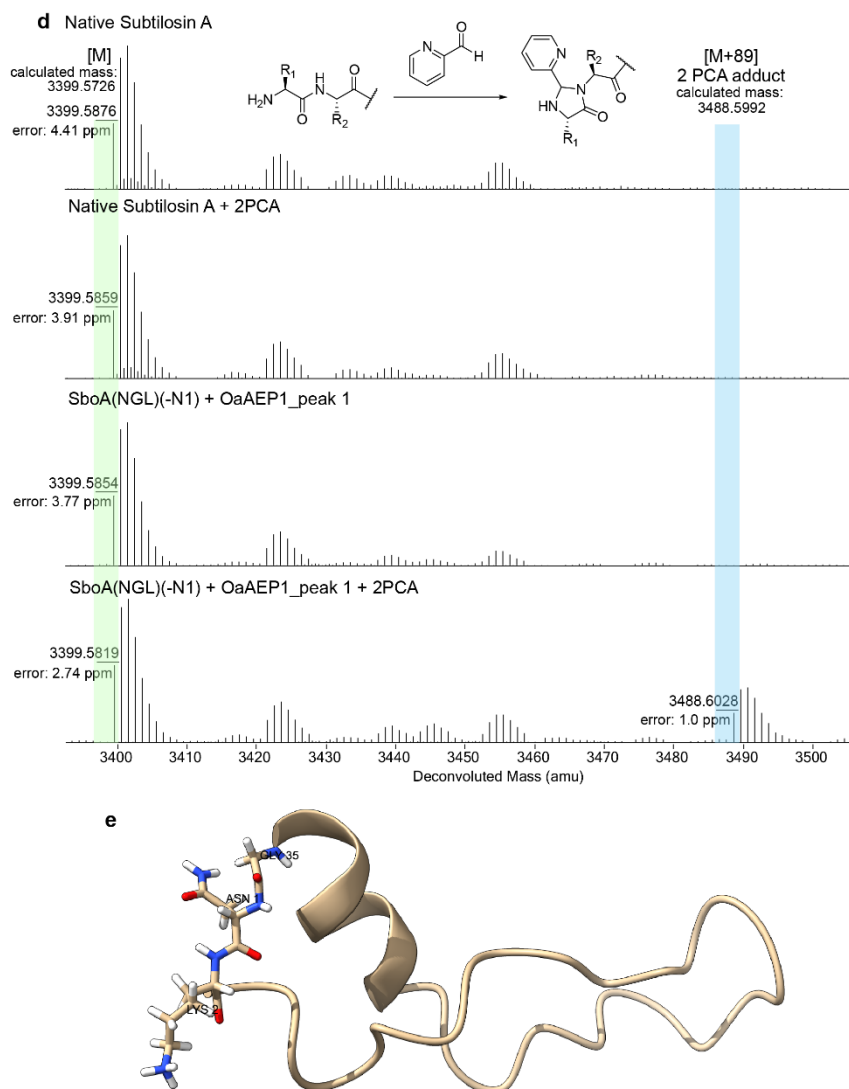

Figure S1. (a) Extracted ion chromatograms of native subtilisin A standard and the products of the OaAEP1 reaction with SboA(NGL)(-N1). (b) MS-MS analysis of native subtilisin A and the two products produced by OaAEP1. Neither product nor the authentic standard resulted in any fragment ions consistent with head-to-tail cyclization. As shown in Fig. S2, the linear analog readily fragments. (c) MALDI-TOF MS analysis of Lys-C digestions of native subtilisin A standard and the products of the OaAEP1 reaction with SboA(NGL)(-N1). Only native subtilisin A and the OaAEP1 peak 2 product were hydrolyzed ( $M+18$ ), consistent with cleavage of an amide bond inside the macrocycle. Peak 1 peptide was not hydrolyzed by endoproteinase LysC, consistent with the side chain of Lys1 being involved in amide bond formation by OaAEP1. (d) HR-ESI analysis of 2-PCA reaction with native subtilisin A and cyclization isomers from OaAEP1 cyclization of SboA(NGL)(-N1). The presence of a 2-PCA adduct with peak 1 but not subtilisin A standard indicates a free N-terminal  $\alpha$ -amine group in the former, consistent with an iso-peptide cyclized product. (e) NMR structure of subtilisin (PDB 1pxq)<sup>13</sup> where Asn1, Lys2 (N-terminal residue in SboA(NGL)(-N1)), and Gly35 (last residue) are shown in stick format.



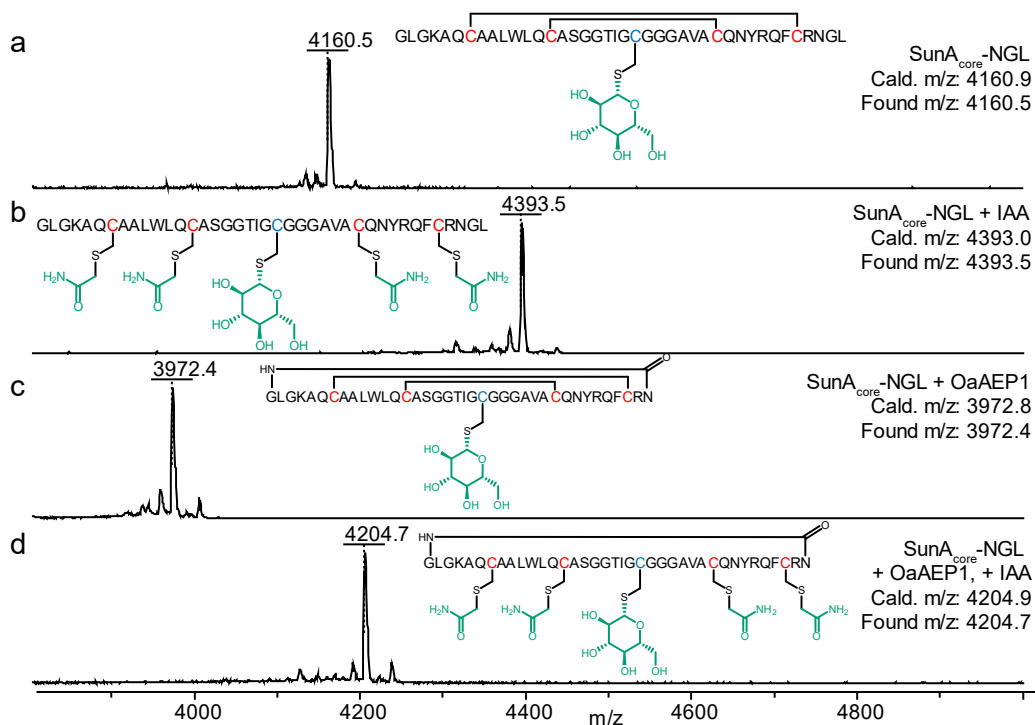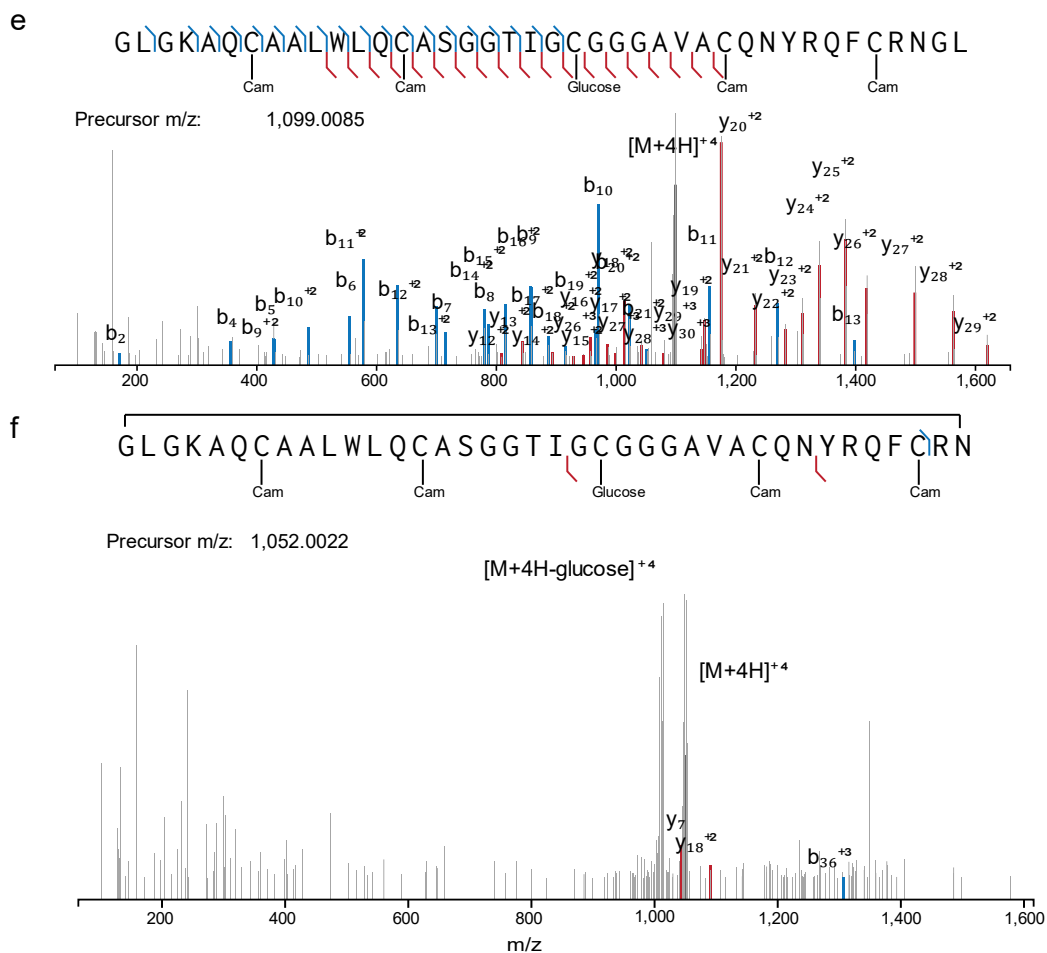

Figure S3. MALDI-TOF MS analysis of (a) His-SUMO-tev-SunA<sub>core</sub>\_NGL co-expressed in *E. coli* with the *S*-glycosyl transferase SunS,<sup>12</sup> and treated with TEV protease *in vitro* to remove the SUMO tag; (b) TCEP-reduced, and iodoacetamide (IAA) alkylated peptide from panel a; (c) OaAEP1 treated peptide from panel a resulting in loss of the C-terminal Gly-Leu motif and an additional water from N-to-C cyclization; and (d) TCEP-reduced and IAA-alkylated product of the cyclic peptide resulting from (c). The square brackets connecting Cys residues in the chemical structures represent disulfide bonds. (e) ESI-MS/MS analysis of peptide in panel b; (f) ESI MS/MS analysis of the peptide in panel d. For the cyclized sample, the sugar moiety was labile under our condition for collision induced dissociation. Assignments of b/y ions are shown in Tables S2 and S3. Abbreviations: Cam = carbamidomethyl.

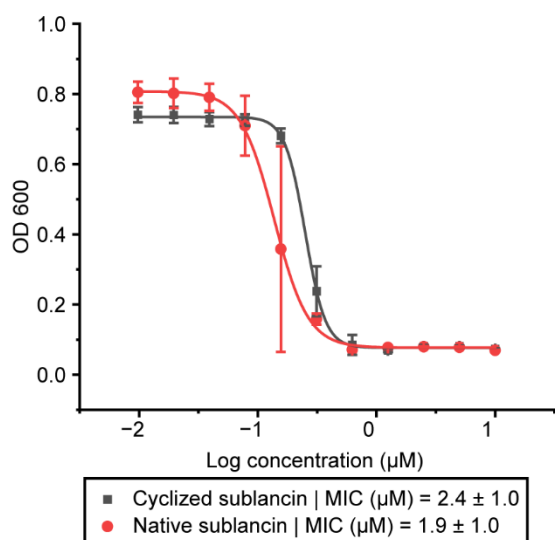

Figure S4. Bioactivity of native sublancin (●) and head-to-tail cyclized sublancin (peptide from panel d, Fig. S3) (■). Bacteria were treated with peptide at the indicated concentrations, grown in LB media at 30 °C and the OD<sub>600</sub> was measured after 6 h.<sup>15</sup> Indicator strain: *B. subtilis* 168 ΔSPβ.

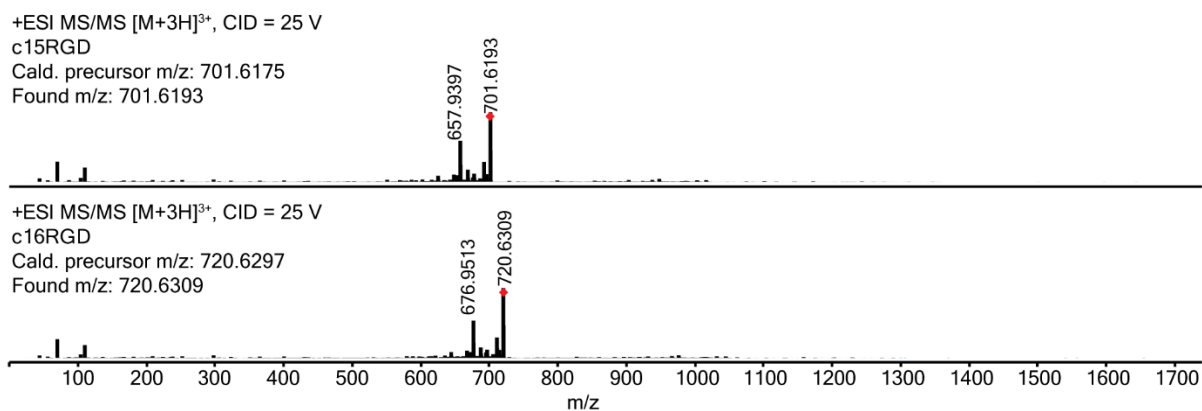

Figure S5. ESI-MS/MS analysis of (a) c15RGD and (b) c16RGD. Since the peptides were head-to-tail cyclized, the MS/MS spectra did not show characteristic b/y ions under similar CID condition that readily fragmented the non-cyclized variants (see Fig. S6). The -44 Da species are likely decarboxylated products of the parent ions.

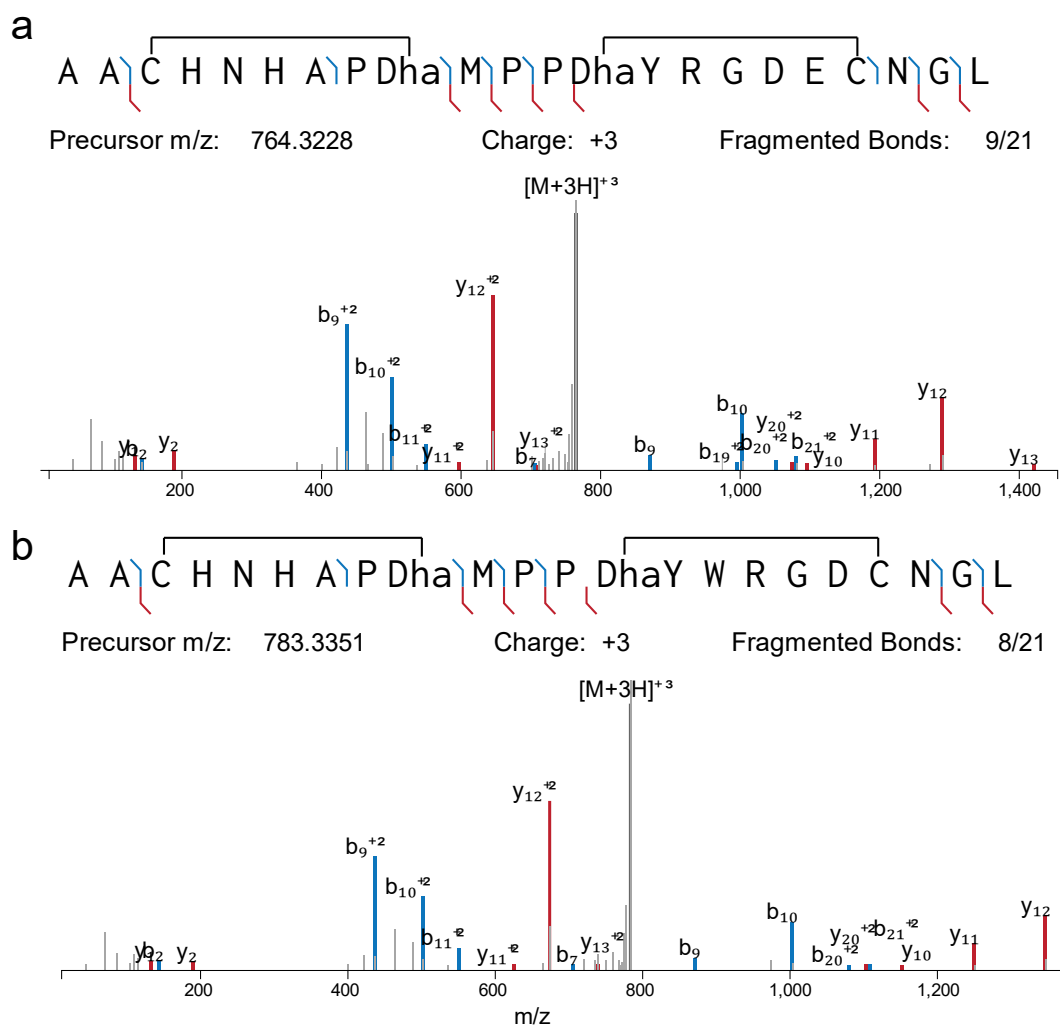

Figure S6. ESI-MS/MS analysis of ProcM-modified (a) 15RGD\_NGL and (b) 16RGD\_NGL. Matched b/y ions are shown in Tables S4-5.

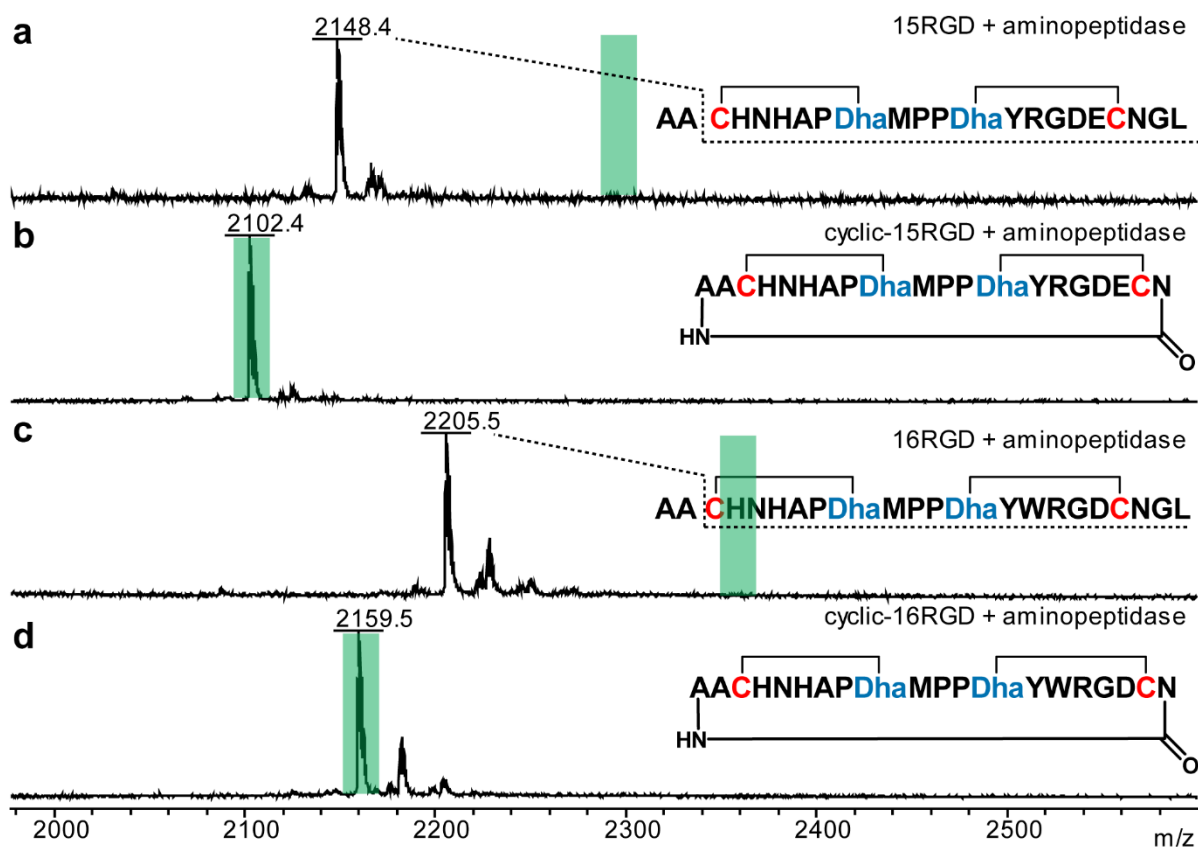

Figure S7. (a-d) Aminopeptidase digestion of 15RGD, c15RGD, 16RGD, and c16RGD. Green boxes indicate the masses of undigested peptides. The dotted line indicates digested fragments resulting from aminopeptidase activity, which was stopped at the lanthionine residues.

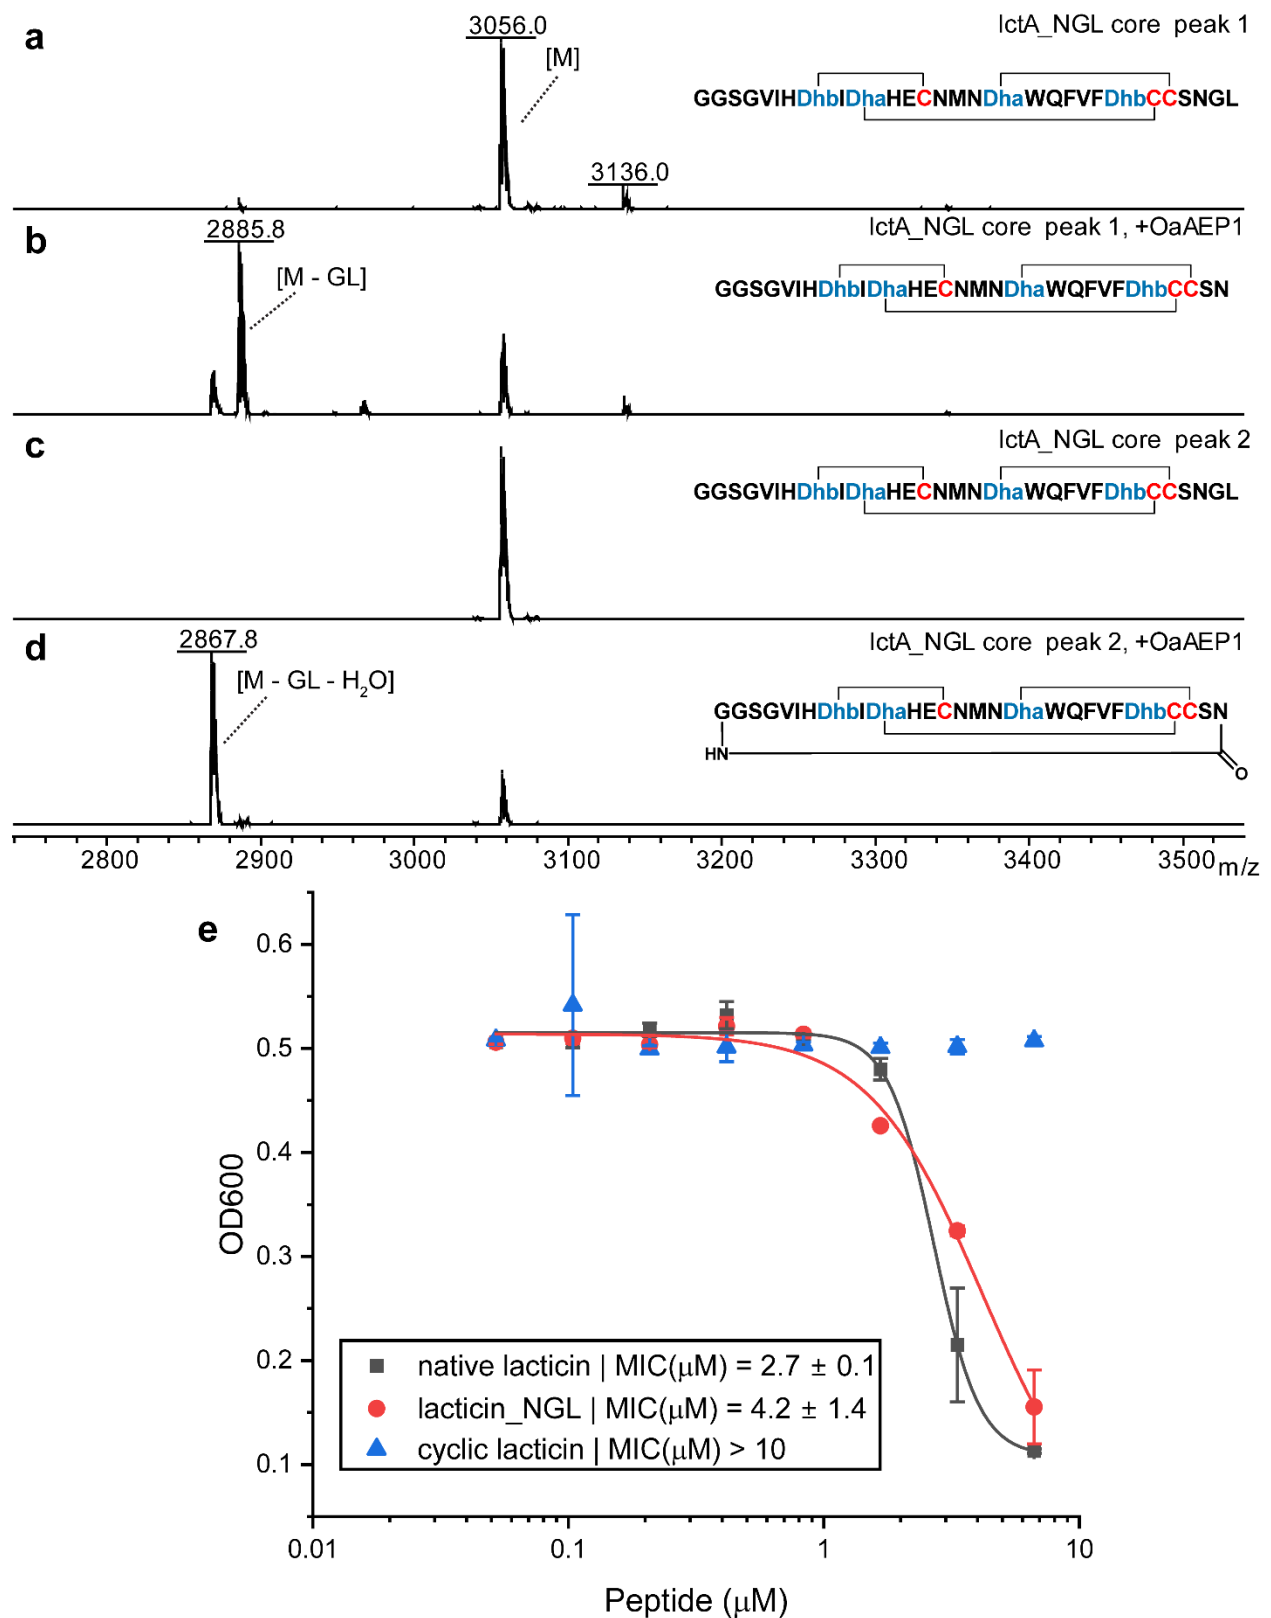

Figure S8. (a,c) HPLC-purified LctA after co-expression with LctM and cleavage by trypsin. (b,d) OaAEP1 treatment of the core peptides. (e) Bioactivity of native lactacin 481 (■), non-cyclized

lctA\_NGL core peak 2 (●), and its head-to-tail cyclic product (▲). Bacteria were treated with peptide at the indicated concentrations, grown in GM17 media at 30 °C and the OD<sub>600</sub> was measured after 18 h. Indicator strain: *L. lactis cremoris*.

Table S1. Assigned b/y ions for Figure S2.

| ions | Experimental<br>m/z | Theoretical<br>m/z | Mass Error<br>(ppm) |
|------|---------------------|--------------------|---------------------|
| y1   | 133.0614            | 133.0608           | 4.726               |
| y2   | 190.083             | 190.0822           | 4.0238              |
| y3   | 376.1621            | 376.1615           | 1.475               |
| y4   | 489.2469            | 489.2456           | 2.6466              |
| y10  | 516.2464            | 516.2508           | -8.5943             |
| y5   | 546.2669            | 546.2671           | -0.3096             |
| y6   | 691.3212            | 691.3198           | 2.0553              |
| b8   | 764.3439            | 764.343            | 1.2253              |
| y8   | 861.429             | 861.4253           | 4.2915              |
| b10  | 892.4038            | 892.4015           | 2.5308              |
| b20  | 936.9366            | 936.9363           | 0.3587              |
| y9   | 960.4573            | 960.4573           | 0.0175              |
| b11  | 963.4384            | 963.4387           | -0.2652             |
| M+3H | 1140.203            | 1140.202           | 1.1217              |
| b26  | 1230.074            | 1230.074           | 0.1707              |
| b14  | 1278.603            | 1278.6             | 2.4093              |
| b29  | 1364.644            | 1364.643           | 0.702               |
| b15  | 1393.625            | 1393.627           | -1.5495             |
| b30  | 1437.176            | 1437.169           | 5.012               |
| b16  | 1450.658            | 1450.649           | 6.3258              |
| b32  | 1522.225            | 1522.222           | 1.8664              |
| b33  | 1615.261            | 1615.261           | -0.1325             |
| b18  | 1660.78             | 1660.786           | -3.1596             |

Table S2. Assigned b/y ions for Figure S3e.

| Ions | Charges | Experimental<br>m/z | Theoretical<br>m/z | Mass Error<br>(ppm) |
|------|---------|---------------------|--------------------|---------------------|
| b2   | 1       | 171.1128            | 171.1128           | -0.0027             |
| b4   | 1       | 356.2296            | 356.2292           | 1.0542              |
| b5   | 1       | 427.2677            | 427.2663           | 3.1866              |
| b9   | 2       | 429.2203            | 429.2185           | 4.1044              |
| b10  | 2       | 485.7609            | 485.7606           | 0.6828              |
| b6   | 1       | 555.326             | 555.3249           | 1.9476              |
| b11  | 2       | 578.8015            | 578.8002           | 2.2057              |
| b12  | 2       | 635.3445            | 635.3423           | 3.5362              |
| b13  | 2       | 699.3734            | 699.3715           | 2.6548              |
| b7   | 1       | 715.3572            | 715.3556           | 2.2755              |

|      |   |          |          |         |
|------|---|----------|----------|---------|
| b14  | 2 | 779.3876 | 779.3869 | 0.9364  |
| b8   | 1 | 786.3951 | 786.3927 | 3.0695  |
| y12  | 2 | 808.3675 | 808.3645 | 3.7551  |
| b15  | 2 | 814.9079 | 814.9054 | 3.0345  |
| y13  | 2 | 843.8859 | 843.883  | 3.411   |
| b9   | 1 | 857.4313 | 857.4298 | 1.7492  |
| b16  | 2 | 858.4264 | 858.4214 | 5.7761  |
| b17  | 2 | 886.9343 | 886.9322 | 2.3974  |
| y14  | 2 | 893.4189 | 893.4172 | 1.8709  |
| b18  | 2 | 915.4451 | 915.4429 | 2.397   |
| y15  | 2 | 928.9396 | 928.9358 | 4.1063  |
| y26  | 3 | 946.0886 | 946.0892 | -0.6358 |
| b19  | 2 | 965.9696 | 965.9667 | 2.9549  |
| b10  | 1 | 970.516  | 970.5139 | 2.2048  |
| y17  | 2 | 985.9617 | 985.9572 | 4.5139  |
| y27  | 3 | 999.4378 | 999.4328 | 5.0501  |
| y18  | 2 | 1014.471 | 1014.468 | 2.8768  |
| b20  | 2 | 1022.512 | 1022.509 | 2.9577  |
| y28  | 3 | 1042.123 | 1042.119 | 4.082   |
| b21  | 2 | 1051.021 | 1051.02  | 1.7053  |
| y29  | 3 | 1079.82  | 1079.814 | 5.8966  |
| M+4H | 4 | 1099.016 | 1099.009 | 6.5358  |
| y30  | 3 | 1141.845 | 1141.84  | 4.6684  |
| y19  | 2 | 1147.002 | 1146.998 | 3.9002  |
| b11  | 1 | 1156.596 | 1156.593 | 2.6196  |
| y20  | 2 | 1175.514 | 1175.508 | 4.544   |
| y21  | 2 | 1232.056 | 1232.05  | 4.8792  |
| b12  | 1 | 1269.679 | 1269.677 | 1.3939  |
| y22  | 2 | 1282.579 | 1282.574 | 3.7202  |
| y23  | 2 | 1311.093 | 1311.085 | 5.9794  |
| y24  | 2 | 1339.603 | 1339.596 | 5.5296  |
| y25  | 2 | 1383.117 | 1383.112 | 3.8992  |
| b13  | 1 | 1397.738 | 1397.736 | 1.7098  |
| y26  | 2 | 1418.636 | 1418.63  | 4.3958  |
| y27  | 2 | 1498.652 | 1498.646 | 4.2766  |
| y28  | 2 | 1562.679 | 1562.675 | 2.7639  |
| y29  | 2 | 1619.221 | 1619.217 | 2.7106  |

Table S3. Assigned b/y ions for Figure S3f.

| <b>Ions</b> | <b>Charge</b> | <b>Experimental<br/>m/z</b> | <b>Theoretical<br/>m/z</b> | <b>Mass Error (ppm)</b> |
|-------------|---------------|-----------------------------|----------------------------|-------------------------|
| y7          | 1             | 1043.489                    | 1043.484                   | 4.6336                  |
| M+4H        | 4             | 1051.986                    | 1052.002                   | -15.8946                |
| y18         | 2             | 1090.515                    | 1090.501                   | 12.7955                 |

|     |   |         |          |         |
|-----|---|---------|----------|---------|
| b36 | 3 | 1306.28 | 1306.282 | -1.9402 |
|-----|---|---------|----------|---------|

Table S4. Assigned b/y ions for Figure S6a.

| Ions | Charge | Experimental<br>m/z | Theoretical<br>m/z | Mass Error<br>(ppm) |
|------|--------|---------------------|--------------------|---------------------|
| y1   | 1      | 132.1024            | 132.1019           | 3.7762              |
| b2   | 1      | 143.0815            | 143.0815           | -0.0312             |
| y2   | 1      | 189.1236            | 189.1234           | 1.2418              |
| b9   | 2      | 436.1864            | 436.185            | 3.1371              |
| b10  | 2      | 501.7072            | 501.7053           | 3.8436              |
| b11  | 2      | 550.2331            | 550.2317           | 2.6287              |
| y11  | 2      | 596.7565            | 596.7562           | 0.4827              |
| y12  | 2      | 645.2836            | 645.2826           | 1.5591              |
| b7   | 1      | 705.2877            | 705.2886           | -1.2172             |
| y13  | 2      | 710.8043            | 710.8028           | 2.0625              |
| M+3H | 3      | 764.3237            | 764.3228           | 1.1537              |
| b9   | 1      | 871.3624            | 871.3628           | -0.4439             |
| b19  | 2      | 994.8979            | 994.9011           | -3.1961             |
| b10  | 1      | 1002.403            | 1002.403           | -0.2661             |
| b20  | 2      | 1051.923            | 1051.923           | -0.0426             |
| y20  | 2      | 1074.94             | 1074.944           | -2.8607             |
| b21  | 2      | 1080.434            | 1080.433           | 0.2992              |
| y10  | 1      | 1095.452            | 1095.452           | -0.7152             |
| y11  | 1      | 1192.505            | 1192.505           | 0.2118              |
| y12  | 1      | 1289.56             | 1289.558           | 1.542               |
| y13  | 1      | 1420.603            | 1420.598           | 3.2441              |

Table S5. Assigned b/y ions for Figure S6b.

| Ions | Charge | Experimental<br>m/z | Theoretical<br>m/z | Mass Error<br>(ppm) |
|------|--------|---------------------|--------------------|---------------------|
| y1   | 1      | 132.1025            | 132.1019           | 4.5332              |
| b2   | 1      | 143.0818            | 143.0815           | 2.0655              |
| y2   | 1      | 189.1239            | 189.1234           | 2.828               |
| b9   | 2      | 436.1862            | 436.185            | 2.6786              |
| b10  | 2      | 501.7076            | 501.7053           | 4.6409              |
| b11  | 2      | 550.2331            | 550.2317           | 2.6287              |
| y11  | 2      | 625.2769            | 625.2746           | 3.7232              |
| y12  | 2      | 673.8031            | 673.801            | 3.185               |
| b7   | 1      | 705.2904            | 705.2886           | 2.611               |
| y13  | 2      | 739.3217            | 739.3212           | 0.6845              |
| M+3H | 3      | 783.3369            | 783.3351           | 2.3512              |
| b9   | 1      | 871.3618            | 871.3628           | -1.1325             |
| b10  | 1      | 1002.405            | 1002.403           | 1.2303              |

|     |   |          |          |         |
|-----|---|----------|----------|---------|
| b20 | 2 | 1080.44  | 1080.441 | -1.0225 |
| y20 | 2 | 1103.463 | 1103.462 | 0.6025  |
| b21 | 2 | 1108.956 | 1108.952 | 3.664   |
| y10 | 1 | 1152.489 | 1152.489 | -0.003  |
| y11 | 1 | 1249.545 | 1249.542 | 2.1068  |
| y12 | 1 | 1346.6   | 1346.595 | 3.764   |

## Protein sequences

> His6\_SUMO\_OAAEP (C247A)

MGSSHHHHHHSTSDSEVNQEAKPEVKPEVKPETHINLKVSDGSSEIFFKIKKTTPLRRLM  
EFAKRQKGKEMDSLRFLYDGIRIQADQTPEDLDMEDNDIIEAHREQIGGSARDGDYLHL  
PSEVSRFFRPQETNDDHGEDSVGTRWAVLIAGSKGYANYRHQAGVCHAYQILKRGGLK  
DENIVVFMYYDDIAYNESNPRPGVIINSPHGSVDYAGVPKDYTGEEVNAKNFLAAILGNK  
SAITGGSGKVVDSPNDHIFIYYTDHGAAGVIGMPSKPYLYADELNDALKKKHASGTYK  
SLVFYLEACESGSMFEGILPEDLNIYALTSTNTTESSWAYYCPAQENPPPPEYNVCLGDL  
FSVAWLEDSDVQNSWYETLNQQYHHVDKRISHASHATQYGNLKLGEGLFVYMGSNP  
ANDNYTSLDGNALTPSSIVVNQRDADLLHLWEKFRKAPEGSARKEEAQTQIFKAMSHR  
VHIDSSIKLIGKLLFGIEKCTEILNAVVRPAGQPLVDDWACLRLVGTGFETHCGSLSEYGMR  
HTRTIANICNAGISEEQMAEAASQACASIP\*

> His6\_SboA\_NGL

MGSSHHHHHHSQDPNSMKKAVIVENKGCATCSIGAACLVDGPIPDFEIAAGATGLFGLW  
GNGL\*

> His6\_SboA(insR2)\_NGL

MGSSHHHHHHSQDPNSMKKAVIVENRKGCATCSIGAACLVDGPIPDFEIAAGATGLFGLW  
GNGL\*

>AlbA

MFPFINESVRVHQLPEGGVLEIDYLRDNVSISDFEYLDLNKTAYELCMRMDGQKTAEQI  
LAEQCAVYDESPEDHKDWYYDMLNMLQNKQVIQLGNRASRHTITTSGSNEFFMPLHAT  
FELTHRCNLKCAHCYLESSPEALGTVSIEQFKKTADMLFDNGVLTCEITGGEIFVHPNAN  
EILDYVCKKFKKVAVLTNGTLMRKESLELLKTYKQKIIVGISLDSVNSEVHDSFRGRKGS  
FAQTCKTIKLLSDHGIFVRVAMSVFEKNMWEIHDMAQKVRDLGAKAFSYNWVDDFGR  
GRDIVHPTKDAEQHRKFMEYEQHVDEFKDLIPIPYERKRAANCGAGWKSIVISPFGEV  
RPCALFPKEFSLGNIFHDSYESIFNSPLVHKLWQAQAPRFSEHCMKDKCPFSGYCGGCYL  
KGLNSNKYHRKKHLLLGGK\*

> His-LctA\_NGL

MGSSHHHHHHSQDPNSMKEQNSFNLLQEVTESELDLILGAKGGSGVIHTISHECNMNSW  
QFVFTCCSNGL\*

>LctM

MKKKTYQFEKFLKNTFDQFSIKQNEVLVEDDLNDIIMNVCGKALVLMINEKREMNLML  
GNTPEERYQYFENEYSSTGKAFFEEIKDKFPVIYIDLKNSINSYLKLVSQIMKDFKKDYSL  
VERKIIIEHSTISTMKIKGDLHNGKAVIEITTNKSKLIYKPKSLSDNVFFNNFLKYMDSFFI  
KEGKSTKYKENFYLVNTLDMKTYGWVEYVDKKPINSFEEARNYYRKIGVLLSVAYTLN  
LTDLHFENVISQGENPCIIDLETMFNMPMFVKDYKNESRNIINGKIMDSVVSTGMLPVLG  
IDSLFGGDPGILGGTFSKEERVINPFRDDIKFQKIVVRSVFKDHIPFFNNNNEKRYCKPK  
DYVNDIIGFEKTYKIIIVKNKEKILGFLKKESSSVTCRILFRNTMEYSVLLNAAKSPVYSN  
KREEIFEKLSTFNRLGNDIIKSEISQINTLSIPYFNCQVDSNLIKNDMDGETIFEHTLTPFKC  
FLSKYRRLCVDDMEQQVKLIRFSIQSQEQLFKDGEQFSLYKKQKGSQEDLLIAINELSSIL  
ENNAYIGTSDDTINWMSLGIADNDQILFESLENDIYKGISGIGLALLEYYEFYPNINTKKIL  
KLIYKNISKDFINTNNEPQNYGFYVGLIGEYSFLRKYEKVFHKTSSCNILKNILKDFTPEK  
CQTILPSDDVIAGEAGIIYISNLNNYLEYRDEIDILLKSLSNKIKLKESIASYAHGNSGIAT  
AFVHGYKVTKNEKYLKIFHELWNLENSSKLRRGWTDNRKVDSSYSSQWCHGASGQAIA  
RMEWITVNKTARFLSNSLIKVKKELGELIDILKKEGMYTDNFCLCHGILGNLLILNTYQ

ENFDNKNINLKNEILNNYYSVCN YGLNKGWICGLGTEFYSGLMTGISGILYGLIRQVK  
QKNNFGVLPYVD\*

> His6\_SUMO\_tev\_SunA<sub>core</sub>\_NGL (the TEV recognition sequence is underlined)

MPHHHHHHHGSSMASMSDSEVNQEAKPEVKPEVKPETHINLKVSDGSSEIFFKIKKTTPLR  
RLMEAFAKRQGKEMDSLRFLYDGIQADQTPEDLDMEDNDIIEAHREQIGGIEENLYFQ  
GLGKAQCAALWLQCASGGTIGCGGGAVACQNYRQFCRNGL\*

>SunS

MKLSDIYLELKKGYADSLLYSDLSLLVNIMEYEKDDIDVMSIQSLVAGYEKSDTPTITCGII  
VYNESKRIKKCLNSVKDDFNEIIVLDSYSTDDTVDIKCDFPDVEIKYEKWKNDFSYARN  
KIIEYATSEWIYFIDADNLYSKENKGKIAKVARVLEFFSIDCVVSPYIEEYTGHLYSDDR  
MFRLNGKVVKFHGKVHEEPMNHNHSLPFNFIVNLKVYHNGYNPSENNISKTRRNINLTE  
EMLRLEPENPKWLFFFGRHLHLLDKDEEAIDYLKKSINNYKKFNDQRHFIDALVLLCTLL  
LQRNNYVDLTLYLDILETEYPRCVDVDYFRSAILLVDMQNKLTSLSNMIDEALTDERYS  
AINTTKDHFKRILISLNIQLENWERVKEISGEIKNDNMKKEIKQYLANSLHNIEHVLKGIE  
V\*

> His-ProcA2.8(15RGD)\_NGL

MGSSHHHHHHSQDPNSMSEEQLKAFLTKVQADTSLQEQLKIEGADVVAIAKAAGFSITT  
EDLNSHRQNLSDDDELEGVAGGAACHNHAPSMPPSYRGDECNGL\*

> His-ProcA2.8(16RGD)\_NGL

MGSSHHHHHHSQDPNSMSEEQLKAFLTKVQADTSLQEQLKIEGADVVAIAKAAGFSITT  
EDLNSHRQNLSDDDELEGVAGGAACHNHAPSMPPSYWRGDCNGL\*

>His-LahT150

MGSSHHHHHHSQDPSKKQIQPVTRGRAKVPVIMQMEALECGAASLAMVLAYYKKWVP  
LEQVRVDCGVSRDGSNALNVLKAARNYGLEAKGYRYEPEKLKKEGTFPCIIHWNFNHF  
VVLKGFKGKYAYINDPAKGDVKIPMEEFDRSFTGICLIFKPTDRFEQ\*

>ProcM

MESPSSWKTSWLA AAIAPDEPHKFDRRLEWDELSEENFFAALNSEPASLEEDDPCFEEALQ  
DALEALKA AWDLP LLPVDNNLNRPFDVWVWPIRCHSAESLRQSFVSDSAGLADEIFDQL  
ADSLDLRLCALGDQVLWEAFNKERTPGTMLLAHLGAAGDGSGPPVREHYERFIQSHRR  
NGLAPLLKEFPVLGRLIGTVLSLWFQGSVEMLRICADRTVLQQCFAIPCGHHLKTVKQ  
GLSDPHRGGRAVAVLEFADPNSTANSSMHVVYKPKDMAVDAAYQATLADLNTHSDLS  
PLRTLAIHNGNGYGYMEHVHHLCCANDKELTNFYFNAGRLTALLHLLGCTDCHHENLI  
ACGDQLLLIDTETLLEADLPDHISDASSTTAQPKPSSLQKQFQRSVLRSGLLPQWMFLGE  
SKLAIDISALGMSPPNKPERIALGWLGFNSDGMMMPGRVSQPVEIPTSLPVGIGEVNPFDRF  
LED FCDGFSMQSEALIKLRNRWLDVNGVLAHFAGLPRRIVLRATR VYFTIQRQQLEPTA  
LRSPLAQALKLEQLTRSFLLAESKPLHWPIFAAEVKQMQHLDIPFFTHLIDADALQLGGL  
EQELPGFIQTSGLAAAYERLRNLDTDEIAFQLRLIRGAVEARELHTTPESSPTLPPPATPEA  
LMSSSAETSLEAAKRIAHRLLELAIRDSQQGVVWLGMDLGADGESFSFGPVGLSLYGGSI  
GIAHLLQRLQAQQVSLMDADAIQTAILQPLVGLVDQPSDDGRRRWWRDQPLGLSGCGG  
TLLALT LQGEQAMANSLLAAALPRFIEADQQLDLIGGCAGLIGSLVQLGTESALQLALRA  
GDHLIAQQNEEGAWSSSSSQPGLLGFSGHTAGYAAALAH LHAFSADERYRTAAAAALA  
YERARFNKDAGNWPDYRSIGRSDSDSEPSFMASWCHGAPGIALGRACLWG TALWDEE  
CTKEIGIGLQTAAVSSVSTDHLCCGSLGLMVLLEMLSAGPWPIDNQLRSHCQDVA FQY  
RLQALQRCSAEPIKLRCFGTKEGLLVLPGFFTGLSGMGLALLEDDPSRAVVSQ LISAGLW  
PTE\*

## References

1. D. R. Brademan, N. M. Riley, N. W. Kwiecien and J. J. Coon, *Mol. Cell. Proteom.*, 2019, **18**, S193-S201.
2. J. D. Hegemann, S. C. Bobeica, M. C. Walker, I. R. Bothwell and W. A. van der Donk, *ACS Synth. Biol.*, 2019, **8**, 1204-1214.
3. L. L. Xie, L. M. Miller, C. Chatterjee, O. Averin, N. L. Kelleher and W. A. van der Donk, *Science*, 2004, **303**, 679-681.
4. K. M. Mikula, I. Tascón, J. J. Tommila and H. Iwai, *FEBS Lett.*, 2017, **591**, 1285-1294.
5. R. Yang, Y. H. Wong, G. K. T. Nguyen, J. P. Tam, J. Lescar and B. Wu, *J. Am. Chem. Soc.*, 2017, **139**, 5351-5358.
6. D. V. Rial and E. A. Ceccarelli, *Protein Express Purif.*, 2002, **25**, 503-507.
7. L. Flöhe, T. A. Knappe, M. J. Gattner, A. Schäfer, O. Burghaus, U. Linne and M. A. Marahiel, *Nat. Chem. Biol.*, 2012, **8**, 350-357.
8. B. J. Smithies, Y. H. Huang, M. A. Jackson, K. Yap, E. K. Gilding, K. S. Harris, M. A. Anderson and D. J. Craik, *ACS Chem. Biol.*, 2020, **15**, 962-969.
9. J. I. MacDonald, H. K. Munch, T. Moore and M. B. Francis, *Nat. Chem. Biol.*, 2015, **11**, 326-331.
10. S. C. Bobeica, S. H. Dong, L. Huo, N. Mazo, M. I. McLaughlin, G. Jimenez-Oses, S. K. Nair and W. A. van der Donk, *eLife*, 2019, **8**, e42305.
11. I. R. Rahman, A. Sanchez, W. Tang and W. A. van der Donk, *ACS Infect. Dis.*, 2021, **7**, 2445-2454.
12. S. Biswas, C. V. Garcia De Gonzalo, L. M. Repka and W. A. van der Donk, *ACS Chem. Biol.*, 2017, **12**, 2965-2969.
13. S. Garneau, N. I. Martin and J. C. Vederas, *Biochimie*, 2002, **84**, 577-592.
14. P. M. Himes, S. E. Allen, S. Hwang and A. A. Bowers, *ACS Chem. Biol.*, 2016, **11**, 1737-1744.
15. C. V. Garcia De Gonzalo, E. L. Denham, R. A. Mars, J. Stulke, W. A. van der Donk and J. M. van Dijl, *Antimicrob. Agents Chemother.*, 2015, **59**, 6844-6854.
